# Supplementary material for: Circulating DNA and Survival in Solid Tumors
Source: Oxford University Press journal article supplement (doi:10.1158/1055-9965.epi-15-0893), 2015-11-24
Supplement: 10559965epi150893-sup-154237_1_supp_3208441_nx1q8b.doc [file 10559965epi150893-sup-154237_1_supp_3208441_nx1q8b.doc]

|  | **ID** | **Type tumor** | **Metastatic patients** | **Total** | **Case** | **Control** | **Toltal/**  **tumor cfDNA** | **Plasma/**  **serum** | **Positive (cut-off)** | **HR/OR** | **Other variables** | **Isolation of ctDNA** | **Determination of ctDNA** | **Treatment** |
| --- | --- | --- | --- | --- | --- | --- | --- | --- | --- | --- | --- | --- | --- | --- |
| 1 | Balgkouranidou 2013 (20) | Operable gastric cancer | No | 73 | 43 | 30 | Tumor (SOX17- Methylation | serum |  | HR/OR | Gender, tumor site, differentiation, CEA levels, age and lymph node. | Cell free DNA from serum samples was isolated using the High Pure Viral Nucleic Acid Kit (Roche Diagnostics, Germany). | The methylation status of SOX17 gene in cell free circulating se- rum DNA samples was detected by methylation-specific PCR (MSP) using specific primer pairs for both the methylated and unmethylated promoter sequences. | Node positive patients received adjuvant combination chemotherapy consisting of docetaxel and oxaliplatin, for 4 months (6 cycles) followed by radiotherapy. |
| 2 | Balgkouranidou 2014 (21) | NSCLC | Yes | 74 | 47 | 27 | Tumor  (BRMS1  Methylation) | plasma |  | HR/  OR | Age, smoking, histology, stage, adj. Chemo. | Cell-free DNA was isolated from plasma samples using the High Pure Viral Nucleic Acid Kit (Roche Diagnostics, Mannheim, Germany) . | The methylation status of BRMS1 gene in tissue samples was detected by conventional MSP by using specific primer pairs for both the methylated and unmethylated promoter sequences. | After surgery all patients received standard chemotherapy protocols for adjuvant NSCLC, such as gemcitabine plus taxanes (90%) or platinum-based chemotherapy (10%). |
| 3 | Bidard 2014 (54) | Metastatic uveal melanoma | Yes | 26 | 22 | 4 | Total | plasma | > 145 copies/ml | OR |  | DNA was extracted using the QIAamp circulating nucleic acid kit (Qiagen, Courtaboeuf, France). | DNA was extracted from 5 mL plasma and eluted in a final volume of 36 mL. Bi-PAP PCR assays were performed on 10 mL DNA in three independent experiments. The PCR was done in a total volume of 25 mL including DNA sample, 1 U KlenTaq-S (ScientechCorp, Chesterfield, MO), 13 KlenTaq-S buffer, 8% (v/v) dimethyl sulfoxide, 25 mM of each dNTP, 1 mM dithiothreitol, 0.1 x ROX calibration dye, 0.2 x SYBR Green I dye(Life Technologies, Saint Aubain, France). Total human circulating cell-free DNA (cfcDNA) was quantified using the LINE-1 real-time PCR assay. | Not reported |
| 4 | Camps 2005 (29) | Advanced NSCLC | Yes | 67 | 20 | 47 | Tumor  (Kras-mutation) | serum |  | OR |  | Serum DNA was extracted using the QIAmp Blood Mini Kit (Qiagen, Hilden, Germany). | *K-ras* was amplified by the polymerase chain reaction-restriction fragment length polymorphism (PCR-RFLP) enrichment method, where mismatch primers are designed to create two cleavage sites for the restriction enzyme *Mva* I (Roche Diagnos- tics, Germany). | All patients received gemcitabine (1200 mg/m2, days 1 and 8) combined with cisplatin (70mg/m2 day 1, *n*=64) or carboplatin (AUC=6, day 1, *n*=3) every third week. |
| 5 | Camps 2006 (55) | Advanced NSCLC | Yes | 99 | 62 | 37 | Total  (hTERT) | serum | > 40 ng/dl | HR/OR | Age, Gender, ECOG PS, Histology, Stage. | The extraction and purification of DNA was carried out using commercial kits based on affinity columns (QIAamp® Blood Mini Kit, Qiagen, Hilden, Germany). | The quantification of hTERT was performed using an RT-PCR (Real- Time Polymerase Chain Reaction) based method. The primers and the probe have been designed to specifically amplify the gene of interest, hTERT, generating an amplicon of 98 base pairs. | cisplatin on day 1 + Taxotere on days 1 and 8, every 21 days. |
| 6 | Camps 2011 (30) | Advanced NSCLC | Yes | 251 | 27 | 224 | Tumor  (Kras-mutation) | plasma |  | OR |  | Plasma DNA was extracted using the QIAamp Blood Mini Kit (Qiagen, Hilden, Germany) . | Plasma KRAS codon12 gene mutations were detected by an allelic discrimination method using fluorogenic RT-PCR, with a GeneAmp 7000 SDS for detection and custom designed primers as probes (Applied Biosystems). | atients were treated with cisplatin (75 mg/m2 ) and docetaxel (75 mg/m2 ) on day 1 every 3 weeks. |
| 7 | Castells 1999 (56) | Pancreatic carcinoma | Yes | 44 | 12 | 32 | Tumor  (Kras-mutation) | Plasma |  | OR |  | Plasma DNA was purified on QIAamp spin columns (QiAmp blood kit; Qiagen, Basel, Switzwerland). | Mutations at codon 12 of the K-ras gene were detected by using a primer-mediated restriction fragment length polymorphism method after in vitro amplification with the PCR technique. | Not reported. |
| 8 | Chen 2010 (57) | Unresectable pancreatic cancer | Yes | 91 | 30 | 61 | Tumor  (Kras-mutation) | Plasma |  | OR |  | DNA was extracted from 200ml plasma with QIAamp! blood mini kit (Qiagen, GmbH, Hilden, Germany). | DNA sequence of K-ras gene (nt.5539e5701, GenBank Accession No. NC_000012) was amplified by PCR. | Among 91 patients, 50 patients underwent gemcitabine- based chemotherapy, 35 patients received chemoradiother- apy, and the remaining 6 patients received best supportive treatment (BST). |
| 9 | Dobrzycka 2011 (31) | Serous ovarian epithelial cancer | Yes | 64 | 39 | 25 | Tumor  (Kras-mutation) | plasma |  | OR |  | DNA isolation from 200 ml blood plasma was carried out with commercial kit for blood DNA isolation of Sigma-Aldrich. | DNA solutions were stored at a temperature of 280°C before mutation detection. KRAS codon 12 mutation was detected by enriched PCR-RFLP method with some modification. The method consists of two DNA amplification and two digestion reactions. | Primary treatment generally consisted of surgery, which entails total abdominal hysterectomy, omentectomy, multiple peritoneal and lymph node samplings as well as peritoneal washings for cytology. Adjuvant chemotherapy consisted of different platinum-based treatment regimens. |
| 10 | Gautschi 2004 (40) | NSCLC | Yes | 163  163 | 28  72 | 135  91 | Total | Plasma  serum | 10 ng/ml  50 ng/ml | HR/OR | Age, tumor stage, previous treatment. | Serum and plasma aliquots were stored at ?70°C. DNA was purified from 1 mL serum or plasma using the QIAamp Blood Mini kit (Qiagen, Hilden, Germany), except that washes with buffer AW2 were increased to three to remove inhibitors of the polymer- ase chain reaction (PCR). | Quantification of serum and plasma DNA was performed by real-time PCR essentially. A plasmid containing a genomic fragment of the glyceraldehyde-3-phosphate dehydroge- nase gene (provided by J.W. Donovan, Dana-Farber Cancer Insti- tute, Boston, MA) was used to construct the calibration curve. The assay was linear at least over 5 orders of magnitude. Detection of one gene copy was possible, but reproducibility was achieved at approxi- mately five copies. PCR primers and probe were designed to eliminate cross-reactions with pseudo-genes. | Approximately two thirds of the pa- tients (69%) initiated chemotherapy at study onset, pre- dominantly with cisplatin or carboplatin and taxanes. |
| 11 | Gautschi 2007 (22) | Lung cancer | Yes | 175 | 16 | 159 | Tumor  (Kras-mutation) | plasma |  | HR/OR | Gender, age, advanced tumor stage (IV), radical surgery. | Total DNA was purified from 1 ml aliquots using QIAamp Blood Mini kit (Qiagen, Hilden, Germany). DNA was extracted from agarose gels using the QIA- quick gel extraction kit. DNA concentrations were determined by photospectrometry and normalized to 3 ng/ll. Sequencing was performed using the ABI 3730 Capillary Electrophoresis Genetic Analyzer, and ABI BigDye Terminator v3.1 Cycle Sequencing chemistry (Applied Biosystems, Foster City, USA). | Initial KRAS mutation analysis in matched plasma and PBMC samples was performed at the Laboratory of Oncology and Haematology, University Hospital Bern. After DNA isolation, two-step RFLP–PCR was per- formed using a mismatch-primer that introduced a spe- cific restriction site, such that wild-type products are cleaved but mutated produces remain uncleaved. This allows for enrichment for mutant PCR-products. | Chemotherapy was given to 78% percent of the patients (the study accrued before the introduction of adjuvant chemotherapy for early-stage NSCLC), 27% of patients underwent radical resection, and 12% received radiotherapy with curative intent. Palliative surgery and palliative radiotherapy were not accounted for. Nine (5%) patients were treated with an epidermal growth factor receptor (EGFR) tyrosine kinase inhibitor (TKI) outside of a placebo-controlled clinical trial. |
| 12 | Gobel 2011 (32) | Primary breast caner | Yes | 428 | 93 | 335 | Tumor  (RASSF1A-Methylation) | plasma |  | OR |  | Genomic DNA from plasma and bone marrow super- natant was isolated using the High Pure Viral Nucleic Acid kit (Roche Diagnostics, Mannheim, Germany). | Sodium bisulfite conversion of genomic DNA was per- formed using the EZ DNA Methylation-Gold KitTM (Zymo Research, Orange, CA, USA). A set of primers and probe, designed specifically for bisulfite-converted DNA, was used for the RASSF1A gene. | Types of primary surgical treatment were: mastectomy (23%), skin sparing mastectomy (13%), and breast-con- serving therapy (64%). Neoadjuvant chemotherapy was applied in 13% of patients. Adjuvant therapies were che- motherapy (32%), endocrine therapy (85%), radiotherapy (79%), and anti-HER2 therapy (5%). 12% of the patients received only chemotherapy (34% anthracycline, 56% combined anthracycline/taxane, 10% others), 64% only endocrine therapy. 20% of the study population received chemotherapy and endocrine therapy (33% anthracycline, 53% combined anthracycline/taxane, 14% others). 55% of the patients, who were treated with an endocrine therapy, received tamoxifen (13% in combination with GnRH- Analoga), whereas for 23% of this groups aromatase inhibitors were used. |
| 13 | Hoshimoto 2012 (33) | Melanoma | Yes | 35 | 8 | 27 | Tumor  (AIM1-  Methylation) | serum |  | OR |  | DNA was extracted and quantified; up to 300 ng of DNA was subjected to sodium bisulfite modification using EpiTect bisulfite kit(Qiagen, Valencia, CA) | EpiTYPER assay(Sequenom, San Diego, CA) is a tool for detection and quantification of DNA methylation using MALDI-TOF MS and MassCLEAVE analysis based on a base- specific cleavage reaction | Not reported |
| 14 | Kamat 2010 (41) | Ovarian cancer | Yes | 82 | Not reported | Not reported | Total | plasma | ≥ 22,000 IU/mL  (3 vs 1 tertile) | HR | High stage, serous histology, high CA125 | DNA extraction was performed using Qiagen DNA extraction Mini kit (QIAGEN Biosciences, MD). | Quantification of total plasma DNA was performed using real-time PCR with TaqMan Assay (Applied Biosystems, Foster City, CA) with primers directed to beta- globin | All patients initially underwent surgical cytoreduction followed by adjuvant therapy as determined by the treating gynecologic oncologist. Platinum based chemotherapy was given to all patients who received chemotherapy. |
| 15 | Koyanagi 2006 (34) | Melanoma (stage IV) | Yes | 50 | 15 | 35 | Tumor  (RASSF1A, RARϐ2-Methylation | serum |  | OR |  | Ten milliliters of blood were collected in serum separator tubes (CORVAC, Sherwood-Davis & Geck, St. Louis, MO), centrifuged (3,000 rpm, 15 minutes), and passed through a 13-mm serum filter (Fisher Scientific, Pittsburgh, PA). The DNA quantification was assessed using the PicoGreen quantification assay (Molecular Probes, Eugene, OR; ref. 34). | We assessed the methylation status of Ras association domain family protein 1A (RASSF1A) and retinoic acid receptor-h2 (RAR-b2) as circulating DNA; RASSF1A and RAR-b2 hypermethylation of the promoter region CpG islands was frequently detected in metastatic melanoma tumors. Each methylation status of the bisulfite-treated DNA was determined using two sets of fluorescently labeled primers designed to amplify methylated or unmethylated DNA sequences. | Concurrent biochemotherapy regimen composed of dacarbazine, cisplatin, vinblastine, IFN-a2b, interleukin 2, and tamoxifen. |
| 16 | Kumar 2010 (42) | Advanced NSCLC | Yes | 28 | 14 | 14 | Total | plasma | 97,5-196,6 (3 tertile) | HR | Age, gender, smoking status, performance status, histology, stage, tumor size, TNM factor, tumor location and alcohol and tocacco habits | DNA from stored plasma fractions was isolated using QIAamp DNA Blood Mini Kit (QIAGEN) . | Circulating plasma DNA was quantified using PicoGreen dsDNA Kit (Molecular Probes, USA). PicoGreen reagent is an ultra sensitive fluorescent nucleic acid stain for quantitating double-stranded DNA (dsDNA) in solution. Briefly, PicoGreen dye was diluted 1:200 with TE buffer (10 mM Tris–HCl, 1 mM EDTA, pH 7.5). | Platinum-based chemotherapy for a minimum of 3 cycles. |
| 17 | Lecomte 2002 (23) | Colorectal cancer | Yes | 37 | 26 | 11 | Tumor  (kras2 mutation) | Plasma |  | HR/OR | age and TNM’s stage. | Plasma DNA was extracted using the QIAmp Blood Kit (Qiagen, Courtaboeuf, France). | Analyses were based on the detection of point mutations at codons 12 and 13 of the *KRAS2* gene in tumor and plasma by MASA. | Four patients with rectal cancer underwent preoperative radiotherapy. Sixteen patients re- ceived adjuvant chemotherapy (9 stage II, 7 stage III). |
| 18 | Lee 2011 (43) | Advanced Lung Adenocarcinoma | Yes | 90 | 45 | 45 | Total | plasma | > 5.26  (high vs low) | HR/OR | Age, ECOG PS, stage, first-line therapy. | The DNA was extracted from 200 µL of plasma by using the QIAamp DNA Blood Mini Kit (Qiagen),. The DNA was eluted in a final volume of 50 µL. | To measure the plasma CFDNA concentration, the genomic sequence encoding b-actin (ACTB) was amplified by real-time qPCR. The primers and fluorescent probe used for the qPCR assay were as described by Herrera and colleagues. The purified plasma DNA (2 mL) was amplified using 0.3 μmol/L of each primer (5' CCACACTGTGCCCATCTACG-3' and 5' -AGGATCTTCAT- GAGGTAG TCAGTCAG-3') and 0.25 μmol/L of fluorescent probe (5' -FAM ATGCCCTCCCCCATGCCATCCTGCGT- TAMRA-3'). The PCR was done with the following pro- gram: 10 minutes at 95 ºC, followed by 40 cycles of 15 seconds at 95 °C and 1 minute at 60 °C. Quantitative standard curves were prepared by using serially diluted control genomic human DNA (Applied Biosystems). The fluorescence of the amplified PCR products was detected with an ABI 7900HT Sequence Detection System (Applied Biosystems). The results of the qPCR assay represent the means of 3 independent experiments, each consisting of duplicate samples. | In the gefitinib arm, gefitinib was administered at a daily dose of 250 mg until progression, whereas in the chemotherapy arm, gemcitabine 1,250 mg/m2 (days 1 and 8) and cisplatin 80 mg/m2 (day 1) were given every 3 weeks for up to 9 cycles. |
| 19 | Ludovini 2008 (24) | Radically Resected NSCLC | No | 142 | 76 | 66 | Tumor  (p53 mutation) | plasma |  | HR | Sex, smoking status, tumor type, pN status, stage. | Plasma DNA was extracted using Qiagen columns (Qiamp Blood Kit, Qiagen Milan, Italy); 1 mL of plasma was purified by five passages on the same column, and the resulting DNA was eluted in 50 µl of sterile bidistilled water and stored at -20°C. Tissue DNA conentrations were etimated by spectrophotometry. | Using PCR single-strand conformational polymorphism analysis, we amplified the conserved exons of the p53 gene, exons 5, 6, 7, and 8. | Sixty-eight patients were treated with surgery alone, 4 with stage IIIA had postoperative radiotherapy, 2 with IIIB had chemotherapy, and 2 with stage IIIB had chemotherapy and radiotherapy. |
| 20 | Madic 2015 (58) | Metastatic TNBC | Yes | 21 | 7 | 14 | Tumor (TP53 mutation) | plasma |  | OR |  | DNA was extracted from 5 ml of plasma using the QIAamp circulating nucleic acid kit (Qiagen) | DNA extracted from tumor and preamplified plasma DNA were subjected to single-plex amplification on the Access Array microfluidic system (Fluidigm) using target-specific TP53 primers flanked by universal sequences CS1 and CS2 as described in the TAm-Seq protocol. | Not reported. |
| 21 | Mahon 2014 (25) | Prostate cancer | Yes | 75 | 50 | 25 | Tumor  (MSTP1-  Methylation) | plasma |  | HR/OR | Serum PSA, haemoglobin, gleason score, serum alkaline phosphatase, ECOG PS. | free DNA was collected using the QIAamp MinElute Virus Spin Kit. | Bisulphite treatment was carried out on all plasma-free DNA samples for 4 h (Zymo EZ-96 DNA Methylation-Gold Kit #D5008). | chemotherapy (Docetaxel 75 mg m-2 3- weekly or Mitoxantrone 12 mg m-2 3-weekly. |
| 22 | Mirza 2012 (35) | Breast Cancer (IDC) | No | 100 | 20 | 80 | Tumor  (RARϐ2- Methylation) | serum |  | OR |  | Serum DNA was extracted with the Qiamp DNA Blood Mini Kit (Qiagen, Hilden, Germany). | Sensitive methylation-specific PCR (MSP) was used to detect promoter methylation, as we can detect 0.1 % cancer cell DNA from a heterogeneous cell population. Bisulfite modification of the DNA (up to 2 lg) from various sources was carried out. Primers and PCR conditions used for MSP of ERb and RARb2 are from published studies and have been standardized in our laboratory. | None of the patients received radiation or chemotherapy before surgery. Forty-eight patients received CAF (cyclophos- phamide, adriamycin, 5-fluorouracil), while 15 patients received CEF (cyclophosphamide, epirubicin, 5-fluoroura- cil) for their chemotherapy regimen, after which radiotherapy of 50 Gy in 25 fractions was provided. |
| 23 | Misawa 2009 (26) | Neuroblastoma | Yes | 68 | 17 | 51 | Tumor  (RASSF1A- Methylation) | serum |  | HR/OR | age, sex and tumour stage | DNA was extracted from tumour samples using a QIAmp DNA Mini Kit and from serum samples using a QIAmp DNA Blood Mini Kit (Qiagen, Hilden, Germany) | Treatment of tumour DNA and serum DNA with sodium bisulphite was performed with an EZ DNA methylation kit (Zymo Research, Orange, CA, USA). Methylation-specific PCR was performed with primers specific for either methylated or unmethylated DNA spanning the region within the RASSF1A gene | Patients of any age who had stage 1 or 2 disease and those younger than 12 months with stage 3 or 4S disease were given either surgery or surgery with chemotherapy. Patients aged 12 months or older with stage 3 and any patients with stage 4 disease were treated according to the protocol by the Japanese Neuro- blastoma Study Group. The patients with stage 4 disease underwent high-dose chemotherapy with autologous stem-cell rescue after the initial chemotherapy. |
| 24 | No 2012 (44) | Epithelial ovarian cancer | Yes | 36 | Not reported | Not reported | Total  (B2M) | serum |  | HR | Age, stage, histology, residual mass, recurrence | DNA was isolated from 1 ml of serum using the QIAamp DNA mini Kit (Qiagen Inc, Valencia, CA, USA) | Commercially available copy number assay kits were used for DNA quantification. TaqMan primers and probes for beta-2- microglobulin (B2M: assay ID: Hs00119644_cn), *ABCF2* (assay ID: Hs03001077_cn), *RAB25* (assay ID: Hs02686900_cn) and *CLDN4* (assay ID: Hs07520413_cn) genes used in this study were purchased from Applied Biosystems (Carlsbad, CA, USA) and confirmed using the Genbank database. | Patients with ovarian cancer underwent platinum-based adjuvant chemotherapy if indicated. |
| 25 | Nygaard 2014 (45) | Advanced NSCLC | Yes | 53 | not reported | not reported | Total | plasma | > 75th percentile | HR | MTV (metabolic tumour volume), TLG (total lesion glycolysis), PS (performance status), stage | Plasma was obtained from a pre-treatment peripheral 10 ml EDTA-blood sample by centrifugation at 2000 g for 10 min, and stored at – 80°C. The plasma was prepared within 2 h after sampling. Total nucleic acid was obtained from 1.0 ml plasma by the use of a QIAsymphony virus/bacteria midi-kit on a QIAsymphony robot (Qiagen, Hilden, Germany). | Analyses of total number of cfDNA alleles were performed by an in-house developed method targeting the peptidylprolyl isomerase A (PPIA) gene. | Standard first-line chemotherapy comprising carboplatin (dose based on AUC5, given i.v. on day 1 every 3 weeks) in combination with vinorelbine (30 mg m -2 given i.v. on day 1 every 3 weeks and 60mg m-2 p.o. day 8 every 3 weeks) for a maximum of six cycles. One patient was additionally treated with bevacizumab in combination with the chemotherapy. Palliative radiotherapy was given if indicated. |
| 26 | Philipp 2014 (36) | Colorectal cancer | Yes | 259 | 57 | 202 | Tumor  (HPP1-methylation) | serum |  | OR |  | Genomic DNA from 200 μL of each serum sample was isolated using the High Pure Viral Nucleic Acid Kit (Roche Applied Science, Mannheim, Germany). | The specificity of all reactions for methylated DNA was confirmed by separately amplifying completely methylated and unmethylated human control DNA (Chemicon, Temecula, CA) with each set of primers and probes. The percentage of fully methylated reference (PMR) at a specific locus was calculated by dividing the gene/Alu ratio of a sample by the gene/Alu ratio of fully methylated, bisulfite-treated DNA (CpGenomeTM Universal Methylated DNA, Millipore, Billerica, MA) and multiplying by 100. A gene was considered methylated if the percentage of the fully methylated reference value was > 0. | Not reported. |
| 27 | Ren 2006 (52) | Hepatocellular carcinoma | Yes | 79 | 41 | 38 | Total | plasma | ≥ 36.6 ng/mL | OR |  | Plasma and control lymphocyte DNAs were extracted with QIAamp® DNA Blood Midi Kit (Qiagen, Hilden, Germany). | The quantity of plasma DNA was calculated by regression equation which was established by intensity of standard DNA content. | Surgical treatment |
| 28 | Singh 2015 (46) | Pancreatic cancer | Yes | 127 | 75 | 52 | Total | plasma | > 62 ng/ml | HR/OR | Age, sex, tumor mass, vascular encasement, locally advanced, lymphtic invasion, metastasis. | Circulating DNA was extracted from 200 μL of plasma using QIAamp DNA Blood Mini kit (Qiagen, USA). | DNA samples were quantified using *Picodrop*TM spectrophotometer (Pico- drop Ltd., UK). The *A*260/*A*280 ratio (for DNA purity) in all the samples was recorded to rule out protein contamination. | 25 patients surgery, 68 patients chemotherapy |
| 29 | Sirera 2011 (47) | Advanced NSCLC | Yes | 446 | 223 | 223 | Total (hTERT) | plasma | > 49,8 ng/ml | HR/OR | Age, performance status, gender, stage, histology, number of locations | Free DNA was extracted and purified from 400 μl of plasma by using commercial DNA affinity columns (QIAamp- Blood Mini Kit, QIAGEN, Chatsworth, CA), eluted in 60 μl of kit’s elution buffer. | The plasma-free DNA concentration was measured by using a previously described highly reproducible quantitative real-time polymerase chain reaction targeting the *hTERT* gene.22 The two primers and the minor groove binding probe were designed to amplify specifically the gene of interest, *hTERT*, generating an amplicon of 98 base pairs. | Cisplatin/docetaxel. |
| 30 | Sozzi 2009 (53) | Lung Cancer | Yes | 23 | 12 | 11 | Total | plasma | > 6.3 ng/ml  (tertile 3 vs tertile 1) | OR |  | Plasma separation and DNA extraction were performed as pre- viously reported. The DNA purified from 1 ml of plasma was eluted in a final volume of 50 ml of water. Testing of plasma DNA was performed without knowledge of the case/control status. | To quantify free circulating DNA in plasma we used a real-time quantitative PCR approach based on the amplification of the human telomerase reverse transcriptase locus (hTERT). Plasma DNA levels were assessed for all baseline samples and at the time of cancer diagnosis and resection. | Not reported. |
| 31 | Spindler 2012 (48) | Metastatic colorectal cancer | Yes | 106 | 26 | 80 | Total | plama | > 75% quartile | HR/OR | Number of metastatic sites, anatomic site | DNA was purified using a QIAamp DNA Mini kit (Qiagen) | Quantification of cfDNA was done by calculating the copy number of gCYC alleles as 10 [y-intercept (gCYC)- meanCt (gCYC)]/slope (gCYC) and normalizing this to the plasma volume. | Treatment consisted of irinotecan 350 mg/m2 every 3 weeks combined with weekly cetuximab 250 mg/m2 (initial loading dose was 400 mg/m2). |
|  |  | Metastatic colorectal cancer | Yes | 35 | 7 | 28 | Tumor  (Kras mutation) | plasma | > 75% quartile | HR/OR | Number of metastatic sites, anatomic site | DNA was purified using a QIAamp DNA Mini kit (Qiagen) | KRAS analysis of primary tumor and metastases was conducted using a KRAS DxS kit (Qiagen)  Quantification of KRAS was done by calculating the copy number of mutated KRAS alleles as 10[(y-intercept(KRAS)-meanCt (KRAS)]/slope (KRAS) and normalizing this to the plasma volume. | Treatment consisted of irinotecan 350 mg/m2 every 3 weeks combined with weekly cetuximab 250 mg/m2 (initial loading dose was 400 mg/m2). |
| 32 | Spindler 2014 (27) | Colorectal Cancer | Yes | 86 | Not reported | Not reported | Total | plasma | 7,100 alleles/ml | HR | age (>/<66 years), PS, cfDNA in quartiles (treated as a continuous variable) and KRAS/BRAF mutation status. | DNA was purified from 1 ml of plasma using a QIAsymphony virus/bacteria midi-kit on a QIAsymphony robot (Qiagen). | The level of cfDNA was measured by qPCR. The cyclophillin gene (gCYG) was used as target and Ct values used for calcu- lations of the number of alleles/ml plasma. Samples with con- taminating DNA from B-lymphocytes were excluded from further analysis. | Patients were treated with intravenous irinotecan monotherapy 350 mg/m2 q3w and supportive care according to local guidelines. |
| 33 | Swisher 2005 (37) | Epithelial ovarian cancer | Yes | 69 | 21 | 48 | Tumor  (p53-mutation) | plasma |  | OR |  | Plasma, serum, and cell- free peritoneal fluid DNA was extracted using the QIAamp DNA Mini kit (Qiagen, Valencia, Calif). Some samples were concentrated in a speed vac 2-4 X. Ten to 15 mL of plasma DNA was used in amplification reactions. Plasma DNA was quantified after extraction using the PicoGreen dsDNA Quantification Kit (Molecular Probes, Inc, Eugene, Ore). Total DNA in plasma was calculated based on 100% extraction efficiency. | DNA was polymerase chain reaction (PCR) amplified for all p53 coding exons (2-11) and flanking regulatory regions. Primer sequences and PCR conditions are avail- able from the authors. PCR products were purified and sequenced using Big Dye Terminator chemistry (Perkin- Elmer, Boston, Mass), and run on an ABI 3100 DNA sequencer (Applied Biosystems, Foster City, Calif). Sequencing data were analyzed using Sequencher soft-ware (Gene Codes Corporation, Ann Arbor, Mich). All chromatograms from tumor and plasma sequences were reviewed and compared with those from corresponding normal DNA. | All women received primary therapy containing a taxane and platinum agent. |
| 34 | Tokuhisa 2007 (49) | Hepatocellular carcinoma | Yes | 96 | 35 | 61 | Total | serum | ≥117.8 ng ml-1 | HR/OR | sex, age, cfDNA level, tumour size, number of primary lesion, venous invasion, tumour differentiation grade and TNM stage | DNA was extracted from 1ml of serum with a DNA Extractor SP Kit for Serum and Plasma (Wako Pure Chemical Industries Ltd, Osaka, Japan) | 1 ml of DNA solution was subjected to real-time PCR amplification for quantitative analysis of the GSTP1 gene. Finally, we calculated the amount of DNA on the basis of standard DNAs (leucocyte genomic DNAs) at 16–2000ngml -1 | Not reported. |
| 35 | Trevisiol 2006 (38) | Colorectal cancer | Yes | 86 | 11 | 75 | Tumor (Kras-mutation) | serum |  | OR |  | Serum DNA were extracted on QIamp spin columns (Qiagen, Hilden, GeRmany) | KRAS2 codon 12 gene mutations in serum samples were detected by mutantenriche PCR (ME-PCR) in which the primer sense was designed to introduce a restriction site for the BstNI enzyme only in the wild-type KRAS2 codon 12. | 34 patients with stage B2-C and 17 with stage D carcinoma underwent chemotherapy. 10 patients with rectal carcinomas received preoperative concomitant chemoradiotherapy. 4 of the 17 stage D patients underwent resection of the metastatic tumors. |
| 36 | Van der Drift 2010 (50) | NSCLC | Yes | 31 | 15 | 16 | Total | plasma | > 67 ng/ml  (tertile 3 vs tertile 1) | OR |  | DNA was isolated from 1 ml of plasma using the MagNA Pure LC Total Nucleic Acid Isolation Kit-Large Volume (Roche diagnostics) and eluted in 100 μl of elution buffer. | The DNA concentration was measured by using a highly reproducible real- time quantitative polymerase chain reaction targeting the human β-globin gene. | Surgery, chemo- or radiotherapy |
| 37 | Vinayanuwattikun 2011 (28) | Advanced NSCLC | Yes | 58 | 29 | 29 | Tumor  (SHP1P2Methylation) | plasma | ≥ 700 pg ml-1 | HR/  0R | Sex, age, smoking status, ECOG, Regimen Rx, SHP1P2 methylation | Plasma DNA was extracted from 0.5 to 2 ml of sampled plasma using the QIAamp DNA Blood Mini Kit (Qiagen, Hilden, Germany).  Measurement of the level of circulating DNA was performed through real-time PCR with an ABI Prism 7500 Sequence Detection System with a dual-hybridization probe- specific sequence for *GAPDH* (NC_000012). | Methylation-specific primer-based PCR (MSP-PCR) of SHP1P2. The PCR products for methylated and unmethylated alleles had different sizes and were electrophoresed, visualized, and measured for intensity using Phosphorimager and ImageQuant software (GE Healthcare Life Sciences). The SHP1P2 methylation index (MI) is the ratio of the intensity of the methylated amplicon divided by the sum of the measured intensities of both amplicons. | All patients received a plati- num-based chemotherapy regimen, either in combination (91%) with gemcitabine (36%) or paclitaxel (55%) or as a single agent (9%), according to their physical status. Five patients prematurely stopped treatment after one cycle of chemotherapy (three refused to receive further chemotherapy, one had progressed, and the fifth one exhibited a severe hypersensitivity reaction to chemotherapy). |
| 38 | Vinayanuwattikun 2013 (51) | Advanced NSCLC | Yes | 58 | Not reported | Not reported | Total | plama | ≥ 4,5 ng ml-1 | HR | Sex, age, smoking status, ECOG, Regimen Rx, | plasma sample was extracted using the QIAamp blood mini kit (Qiagen, Hilden, Germany) | A quantitative measurement of plasma-circulating DNA concentrations was determined with a real-time quantitative PCR assay that employed a dual-hybridization probe spe- cific to the GAPDH (NC_000012) sequence and an ABI 7500 sequence detection analyzer (Applied Biosystems). | palliative chemotherapy |
| 39 | Yagyu 2008 (39) | Neuroblastoma | Yes | 86 | 24 | 62 | Tumor (DCR2-Methylation) | serum |  | OR |  | DNA was extracted with a QIAamp DNA Mini kit (Qiagen) To investigate the methylation of DNA, genomic DNA were treated with sodium bisulfite by using an EZDNA methylation kit (Zymo Research) and subjected to methylation- specific PCR using the appropriate primer sets. Based on the sequences after bisulfate treatment, we designed methylation- and unmethylation- specific PCR primers, which recognize sequences unique to the methylated and unmethylated alleles, respectively | Primers were also designed for a reference sequence in the DCR2 promoter which is not affected by DNA methylation. To increase the sensitivity and specificity for the detection of methylated DNA, we firstly conducted nested PCR with serum DNA samples and primer sets that could amplify both methylated and unmethylated alleles, and then real-time PCR was carried out with an ABI Prism 5700 Sequence Detection System (Applied Biosystems), using nested PCR products and methylation-specific and reference sequence primer sets. The DCR2 methylation status was calculated as a methylated-DCR2 allele copy number/reference sequence allele copy number (M/R ratio). Standard curves were constructed in each PCR run with 4-fold serial dilutions containing nest PCR products of KP-N- RTBM1 DNA. Copy numbers were expressed as the average of two measurements. The nested PCR mixture contained Premix Ex Taq HS version (Takara Bio, Inc.), 400 nmol/L of each primer, and 2% of DMSO. The real-time PCR mixture contained SYBR Premix Ex Taq (Takara Bio), 200 nmol/L of each primer, and 2% of DMSO. | Not reported. |
|  |  | non-MNA neuroblastomas | Yes | 68 | 15 | 53 | Tumor (DCR2-Methylation) | serum |  | OR |  | DNA was extracted with a QIAamp DNA Mini kit (Qiagen) To investigate the methylation of DNA, genomic DNA were treated with sodium bisulfite by using an EZDNA methylation kit (Zymo Research) and subjected to methylation- specific PCR using the appropriate primer sets. Based on the sequences after bisulfate treatment, we designed methylation- and unmethylation- specific PCR primers, which recognize sequences unique to the methylated and unmethylated alleles, respectively | Primers were also designed for a reference sequence in the DCR2 promoter which is not affected by DNA methylation. To increase the sensitivity and specificity for the detection of methylated DNA, we firstly conducted nested PCR with serum DNA samples and primer sets that could amplify both methylated and unmethylated alleles, and then real-time PCR was carried out with an ABI Prism 5700 Sequence Detection System (Applied Biosystems), using nested PCR products and methylation-specific and reference sequence primer sets. The DCR2 methylation status was calculated as a methylated-DCR2 allele copy number/reference sequence allele copy number (M/R ratio). Standard curves were constructed in each PCR run with 4-fold serial dilutions containing nest PCR products of KP-N- RTBM1 DNA. Copy numbers were expressed as the average of two measurements. The nested PCR mixture contained Premix Ex Taq HS version (Takara Bio, Inc.), 400 nmol/L of each primer, and 2% of DMSO. The real-time PCR mixture contained SYBR Premix Ex Taq (Takara Bio), 200 nmol/L of each primer, and 2% of DMSO. | Not reported. |
